# Supplementary material
Source: PubMed Central journal article supplement (PMC6646571)
Supplement: ao8b01894_si_001.pdf [file ao8b01894_si_001.pdf]

## Supporting Information

### **Cerium Oxide Nanoparticles Decrease Drought Induced Oxidative Damage in Sorghum Leading to Higher Photosynthesis and Grain Yield**

Maduraimuthu Djanaguiraman, †, § Remya Nair, ‡, Juan Pablo Giraldo# and Pagadala Venkata Vara Prasad, †, \*

†Department of Agronomy, Throckmorton Plant Science Center, Kansas State University, Manhattan, Kansas 66506, USA

‡Department of Energy, Environmental and Chemical Engineering, Washington University in St. Louis, St. Louis, Missouri 63130, USA

#Department of Botany and Plant Sciences, University of California, Riverside, California 92521, USA

§Department of Nano Science and Technology, Tamil Nadu Agricultural University, Coimbatore, TN 641003, India

\*Corresponding Author

E-mail: vara@ksu.edu. Tel: +1 785 532 3746. Fax: +1 785 532 6094.

## Contents

**Figure S1.** Improvement of pollen germination by foliar spray of nanoceria under drought. (a) irrigated and water sprayed, (b) irrigated and nanoceria sprayed, (c) drought and water sprayed and (d) drought and nanoceria sprayed. The growing pollen tube was shown as arrow. (a, b) There is no variation in pollen germination by water or nanoceria sprayed plants under irrigated condition. (c) Drought stress decreased pollen germination. (d) Foliar spray of nanoceria improved pollen germination under drought stress.

**Figure S2.** No effect of drought and/or foliar spray treatments on mesophyll and vascular bundle cell anatomy. (a, b) irrigated and water sprayed, (c, d) irrigated and nanoceria sprayed, (e, f) drought and water sprayed and (g, h) drought and nanoceria sprayed.  $\theta$  represent the cuticle layer,  $\Delta$  indicates the mesophyll cell morphology and number, \* shows xylem morphology and anatomy and # represent phloem morphology and anatomy.

Figure S1

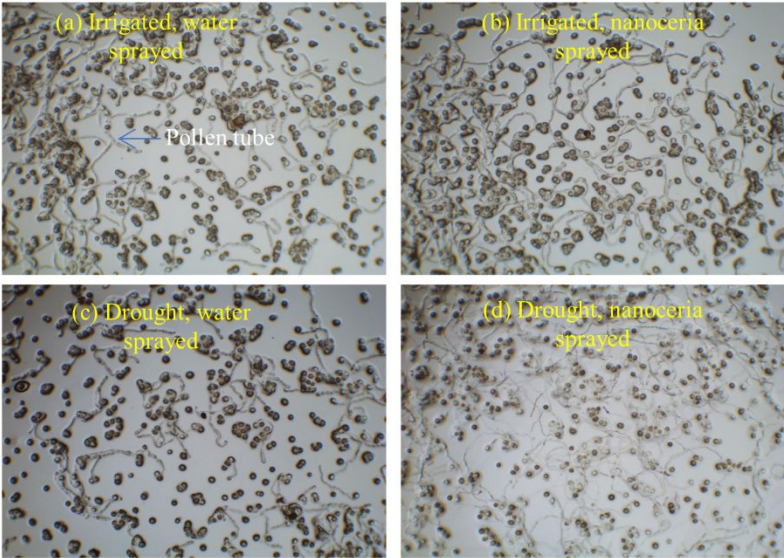

Figure S2

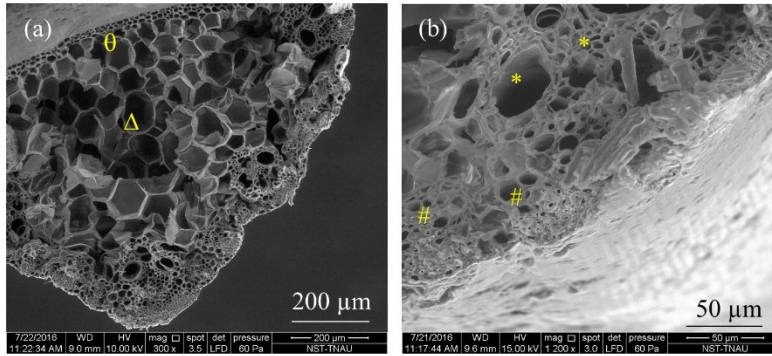

(a, b) Irrigated and water sprayed

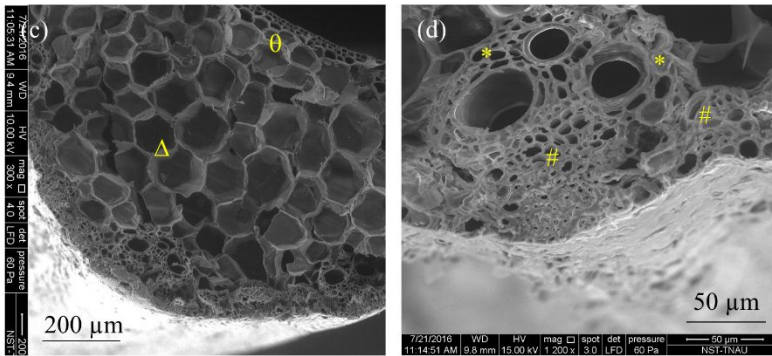

(c, d) Irrigated and nanoceria sprayed

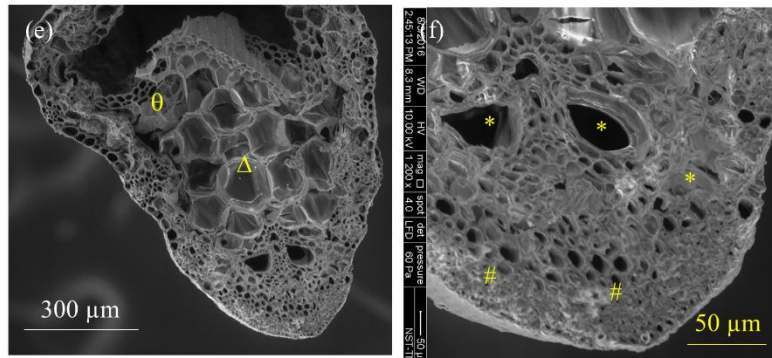

(e, f) Drought and water sprayed

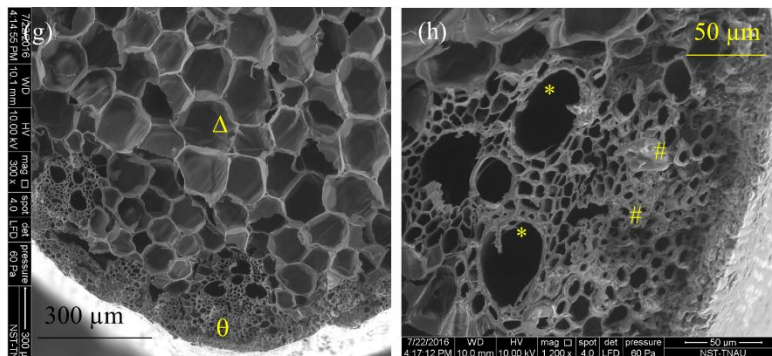

(g, h) Drought and nanoceria sprayed
